# Supplementary material for: Direct Signal Space Construction Luenberger Tracker with Quadratic Least Square Regression for Computationally Efficient DoA Tracking
Source: Hindawi journal article supplement (doi:10.1155/2020/4697381), 2020-06-17
Supplement: f1 [file 4697381.f1.zip]

Archive with 3 entries (3 files):
- 4697381.f1/DataAvailabilityStatement.pdf
- 4697381.f1/DoA_k.xlsx
- 4697381.f1/sigma2_k.xlsx
