# Supplementary material for: Direct Signal Space Construction Luenberger Tracker with Quadratic Least Square Regression for Computationally Efficient DoA Tracking
Source: Hindawi journal article supplement (doi:10.1155/2020/4697381), 2020-06-17
Supplement: f1 [file 4697381.f1.zip › 4697381.f1/DataAvailabilityStatement.pdf]

# Direct Signal Space Construction Luenberger Tracker with Quadratic Least Square Regression for Computationally Efficient DoA Tracking

Bu-Keun Byeon, Ho-Kyoung Lee and Do-Sik Yoo

## <Data Availability Statement>

The data used to support the findings of this study are included within the supplementary information files named 'DoA\_k.xlsx' and 'sigma2\_k.xlsx' :

- (1) '**DoA\_k.xlsx**' includes the numerical values of  $\theta_k(nT)$  in **Figures 4 and 8**
- (2) '**sigma2\_k.xlsx**' includes the numerical values of  $\sigma_k^2[n]$  in **Figure 5**
