# Supplementary material for: Direct Signal Space Construction Luenberger Tracker with Quadratic Least Square Regression for Computationally Efficient DoA Tracking
Source: Hindawi journal article supplement (doi:10.1155/2020/4697381), 2020-06-17
Supplement: f1 [file 4697381.f1.zip › 4697381.f1/DoA_k.xlsx]

## Sheet: Sheet1
The following table list the numerical values of qk(nT) in Figures 4 and 8
n	q1(nT)	q2(nT)	q3(nT)	q4(nT)	q5(nT)
-2	25.0984	60.3693	122.512	74.0644	118.603
-1	26.5599	60.1643	125.106	76.0064	115.803
0	28.1952	60.0411	127.605	77.9867	112.933
1	30	60	130	80	110
2	31.9692	60.0411	132.286	82.0407	107.012
3	34.0975	60.1643	134.456	84.1031	103.977
4	36.379	60.3693	136.504	86.1818	100.904
5	38.8075	60.6556	138.424	88.2709	97.8017
6	41.3763	61.0222	140.212	90.3648	94.6775
7	44.0784	61.4683	141.862	92.4576	91.5405
8	46.9063	61.9926	143.37	94.5437	88.3993
9	49.8524	62.5936	144.732	96.6174	85.2624
10	52.9085	63.2698	145.943	98.6729	82.1385
11	56.0662	64.0192	147.002	100.705	79.0362
12	59.317	64.8399	147.904	102.707	75.964
13	62.6519	65.7295	148.647	104.675	72.9302
14	66.0617	66.6856	149.23	106.602	69.9432
15	69.5372	67.7057	149.65	108.484	67.0112
16	73.0687	68.7868	149.907	110.315	64.1421
17	76.6466	69.9261	150	112.091	61.344
18	80.2612	71.1204	149.928	113.806	58.6244
19	83.9024	72.3664	149.692	115.455	55.9908
20	87.5604	73.6608	149.292	117.035	53.4504
21	91.225	75	148.73	118.541	51.0102
22	94.8863	76.3803	148.007	119.969	48.6769
23	98.5341	77.7979	147.124	121.314	46.4568
24	102.159	79.249	146.086	122.574	44.3561
25	105.75	80.7295	144.893	123.744	42.3805
26	109.298	82.2354	143.55	124.822	40.5354
27	112.793	83.7626	142.061	125.804	38.8259
28	116.226	85.307	140.428	126.689	37.2566
29	119.586	86.8641	138.658	127.472	35.8319
30	122.866	88.4299	136.754	128.153	34.5557
31	126.056	90	134.721	128.73	33.4315
32	129.146	91.5701	132.567	129.2	32.4623
33	132.13	93.1359	130.295	129.563	31.6508
34	134.998	94.693	127.913	129.817	30.9992
35	137.742	96.2374	125.428	129.963	30.5094
36	140.356	97.7646	122.845	129.998	30.1826
37	142.832	99.2705	120.172	129.924	30.0198
38	145.163	100.751	117.416	129.741	30.0214
39	147.343	102.202	114.586	129.449	30.1873
40	149.365	103.62	111.687	129.048	30.5173
41	151.225	105	108.73	128.541	31.0102
42	152.917	106.339	105.721	127.928	31.6649
43	154.437	107.634	102.669	127.211	32.4794
44	155.78	108.88	99.5822	126.392	33.4516
45	156.942	110.074	96.4692	125.473	34.5788
46	157.922	111.213	93.3385	124.457	35.8579
47	158.715	112.294	90.1986	123.347	37.2854
48	159.319	113.314	87.0582	122.145	38.8573
49	159.734	114.271	83.9259	120.855	40.5695
50	159.957	115.16	80.8102	119.48	42.4171
51	159.989	115.981	77.7197	118.025	44.3952
52	159.829	116.73	74.6628	116.493	46.4983
53	159.478	117.406	71.648	114.888	48.7206
54	158.936	118.007	68.6835	113.215	51.056
55	158.205	118.532	65.7774	111.479	53.4982
56	157.287	118.978	62.9377	109.683	56.0405
57	156.185	119.344	60.1722	107.834	58.6758
58	154.902	119.631	57.4884	105.936	61.397
59	153.44	119.836	54.8938	103.994	64.1965
60	151.805	119.959	52.3954	102.013	67.0668
