# Supplementary material for: Direct Signal Space Construction Luenberger Tracker with Quadratic Least Square Regression for Computationally Efficient DoA Tracking
Source: Hindawi journal article supplement (doi:10.1155/2020/4697381), 2020-06-17
Supplement: f1 [file 4697381.f1.zip › 4697381.f1/sigma2_k.xlsx]

## Sheet: Sheet1
The following table list the numerical values of s2k(nT) in Figures 5
n	s21[n]	s22[n]	s23[n]	s24[n]	s25[n]
-2	1.4377	1.0403	0.6838	0.8317	0.647
-1	1.2984	1.0453	0.7061	0.8245	0.6383
0	1.1807	1.0463	0.7476	0.8148	0.6258
1	1.0632	1.0582	0.7809	0.81	0.6044
2	0.9601	1.0616	0.8196	0.8105	0.5969
3	0.8589	1.0462	0.8703	0.7935	0.5807
4	0.7823	1.0399	0.9234	0.7918	0.5765
5	0.7144	1.0426	0.9786	0.7941	0.5708
6	0.6548	1.0355	1.0449	0.7978	0.5706
7	0.6013	1.0289	1.113	0.8002	0.5688
8	0.5522	1.0186	1.1755	0.7953	0.57
9	0.5171	1.0111	1.2442	0.7962	0.567
10	0.4923	1.0161	1.3155	0.804	0.571
11	0.4649	0.9972	1.3979	0.8033	0.5771
12	0.4431	0.9821	1.445	0.8103	0.5801
13	0.4251	0.9682	1.5083	0.824	0.5924
14	0.4114	0.9585	1.5711	0.8298	0.606
15	0.4036	0.9589	1.622	0.8512	0.6178
16	0.3941	0.9403	1.6472	0.8514	0.6324
17	0.3871	0.9395	1.6486	0.877	0.6497
18	0.3853	0.9279	1.6447	0.883	0.6745
19	0.3818	0.917	1.6279	0.8984	0.7006
20	0.3767	0.9036	1.5996	0.9122	0.7356
21	0.3791	0.9076	1.5513	0.9374	0.7747
22	0.3817	0.8899	1.4798	0.9591	0.8088
23	0.383	0.88	1.4243	0.9756	0.8463
24	0.3836	0.8718	1.3502	0.9928	0.9016
25	0.3948	0.8747	1.2881	1.0228	0.9579
26	0.3966	0.8638	1.2148	1.0426	1.0182
27	0.4078	0.8671	1.131	1.0498	1.0907
28	0.4218	0.8602	1.0761	1.0817	1.1454
29	0.4381	0.8619	1.0087	1.0969	1.219
30	0.4557	0.8571	0.9526	1.1122	1.2978
31	0.4739	0.8547	0.8951	1.1333	1.3749
32	0.5013	0.8553	0.8452	1.1481	1.4419
33	0.5307	0.8549	0.7944	1.1447	1.4945
34	0.5657	0.8569	0.7562	1.1602	1.5486
35	0.6155	0.8681	0.7234	1.1773	1.6
36	0.6703	0.8612	0.6973	1.1635	1.6426
37	0.7329	0.8755	0.6708	1.178	1.6587
38	0.7971	0.8839	0.6415	1.1483	1.6479
39	0.8929	0.8738	0.6242	1.1579	1.6338
40	0.9823	0.8883	0.6132	1.1446	1.6162
41	1.0965	0.8964	0.5999	1.1341	1.5728
42	1.2134	0.9081	0.5865	1.1118	1.5203
43	1.3396	0.9126	0.5779	1.0993	1.467
44	1.4776	0.9153	0.5686	1.0797	1.3906
45	1.6248	0.931	0.5667	1.0552	1.3217
46	1.7696	0.9394	0.5626	1.0413	1.237
47	1.8912	0.9522	0.5607	1.0131	1.1653
48	1.9992	0.9639	0.5645	0.9979	1.1129
49	2.0906	0.9644	0.5701	0.9767	1.0439
50	2.136	0.9909	0.5702	0.9568	0.9675
51	2.1297	0.9918	0.5753	0.9359	0.9181
52	2.1311	1.0033	0.5889	0.9252	0.8733
53	2.0674	1.0043	0.5933	0.9055	0.8199
54	1.9549	1.0107	0.6035	0.8891	0.7797
55	1.861	1.018	0.6191	0.868	0.7448
56	1.7262	1.0314	0.64	0.8554	0.7044
57	1.5796	1.038	0.6571	0.845	0.6786
58	1.4346	1.0416	0.6853	0.8359	0.6537
59	1.3069	1.0397	0.7104	0.8236	0.6352
60	1.1791	1.0562	0.7456	0.8186	0.6194
